# Supplementary material for: Marine n−3 Fatty Acids and Prevention of Cardiovascular Disease: A Novel Analysis of the VITAL Trial Using Win Ratio and Hierarchical Composite Outcomes
Source: MDPI journal article supplement (doi:10.3390/nu15194235), 2023-09-30
Supplement: s1 [file s1]

**Supplementary Table S1.** The number of incident cases (%) for each component of the hierarchical composite outcomes in all participants of the VITAL study

| N (%)                            | N-3 fatty acids (N = 12,933) | Placebo (N = 12,938) |
|----------------------------------|------------------------------|----------------------|
| Fatal CHD                        | 37 (0.29)                    | 49 (0.38)            |
| Fatal other CVD including stroke | 105 (0.81)                   | 99 (0.77)            |
| Fatal MI                         | 13 (0.1)                     | 26 (0.2)             |
| Fatal stroke                     | 22 (0.17)                    | 20 (0.15)            |
| Non-fatal MI                     | 132 (1.02)                   | 174 (1.34)           |
| Non-fatal stroke                 | 126 (0.97)                   | 122 (0.94)           |
| Non-fatal CABG/PCI               | 244 (1.89)                   | 283 (2.19)           |

Abbreviations: CVD, cardiovascular disease; CHD, coronary heart disease; MI, myocardial infarction; CABG, coronary artery bypass grafting; PCI, percutaneous coronary intervention.

**Supplementary Table S2.** Results of win ratio analyses for the primary hierarchical composite outcome of major CVD events (prioritizing non-fatal stroke over non-fatal MI) and the secondary hierarchical composite outcome of expanded CVD events (the primary outcome + CABG/PCI, prioritizing non-fatal stroke over non-fatal MI) between n-3 fatty acids group and its placebo group in all participants of the VITAL study (n= 25,871)

|                                                  | The primary hierarchical composite outcome |           | The secondary hierarchical composite outcome |           |
|--------------------------------------------------|--------------------------------------------|-----------|----------------------------------------------|-----------|
| Hierarchical priority                            | Winners                                    | Losers    | Winners                                      | Losers    |
| 1 = Fatal CHD                                    | 600,424                                    | 453,196   | 600,424                                      | 453,196   |
| 2 = Fatal other CVD including stroke             | 1,159,082                                  | 1,222,934 | 1,159,082                                    | 1,222,934 |
| 3 = Non-fatal stroke                             | 1,413,547                                  | 1,411,721 | 1,413,547                                    | 1,411,721 |
| 4 = Non-fatal MI                                 | 1,823,397                                  | 1,426,554 | 1,823,397                                    | 1,426,554 |
| 5 = Non-fatal CABG/PCI                           | NA                                         | NA        | 1,749,502                                    | 1,660,783 |
| Total                                            | 4,996,450                                  | 4,514,405 | 6,745,952                                    | 6,175,188 |
| <b>Reciprocal win ratio<sup>1</sup> (95% CI)</b> | 0.90 (0.79 to 1.04)                        | p = 0.16  | 0.92 (0.81 to 1.03)                          | p = 0.15  |

<sup>1</sup> Reciprocal win ratio < 1 means beneficial effect of n-3 fatty acids supplementation on the composite outcome.

Abbreviations: CVD, cardiovascular disease; CHD, coronary heart disease; MI, myocardial infarction; CABG, coronary artery bypass grafting; PCI, percutaneous coronary intervention; CI, confidence interval.

**Supplementary Table S3.** Results of win ratio analyses for the primary hierarchical composite outcome of major CVD events (prioritizing non-fatal stroke over non-fatal MI) and the secondary hierarchical composite outcome of expanded CVD events (the primary outcome + CABG/PCI, prioritizing non-fatal stroke over non-fatal MI) between n-3 fatty acids group and its placebo group in subgroups with low and high fish consumption at baseline in the VITAL-study

|                                                                                                                                                                                                                                                       | Low fish intake<br>( $< 1.5$ servings/week, $n = 13,515$ ) | High fish intake<br>( $\geq 1.5$ servings/week, $n = 11,922$ ) |
|-------------------------------------------------------------------------------------------------------------------------------------------------------------------------------------------------------------------------------------------------------|------------------------------------------------------------|----------------------------------------------------------------|
|                                                                                                                                                                                                                                                       | Reciprocal win ratio <sup>1</sup> (95% CI)                 | Reciprocal win ratio <sup>1</sup> (95% CI)                     |
| <b>The primary hierarchical composite outcome of major CVD events</b><br>(i.e., prioritizing fatal CHD, fatal other CVD including stroke, non-fatal stroke, and non-fatal MI in this order)                                                           | 0.79 (0.65 to 0.97)                                        | 1.05 (0.86 to 1.30)                                            |
| <b>The secondary hierarchical composite outcome of expanded CVD events (the primary outcome + CABG/PCI)</b><br>(i.e., prioritizing fatal CHD, fatal other CVD including stroke, non-fatal stroke, non-fatal MI, and non-fatal CABG/PCI in this order) | 0.85 (0.72 to 1.01)                                        | 1.01 (0.85 to 1.20)                                            |

<sup>1</sup> Reciprocal win ratio  $< 1$  means beneficial effect of n-3 fatty acids supplementation on the composite outcome.

Abbreviations: CVD, cardiovascular disease; CHD, coronary heart disease; MI, myocardial infarction; CABG, coronary artery bypass grafting; PCI, percutaneous coronary intervention; CI, confidence interval.
